# Supplementary material for: Garlic essential oil ameliorates depression-like behaviors in unpredictable chronic mild stress by modulating the brain NLRP3 inflammasome pathway and influencing the gut barrier and microbiota
Source: Royal Society of Chemistry journal article supplement (doi:10.1039/d3fo00270e), 2023-01-01
Supplement: d3fo00270e1.pdf [file d3fo00270e1.pdf]

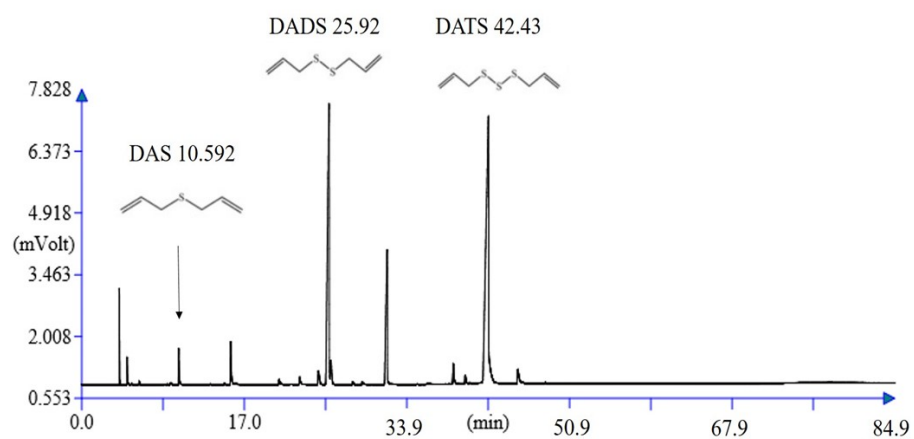

Fig. S1. The profile of active compounds of GEO in GC. GEO, garlic essential oil; GC, gas chromatography; DAS, diallyl sulfide; DADS, diallyl disulfide; DATS, diallyl trisulfide.
